# Supplementary material for: Increasing Genome Sampling and Improving SNP Genotyping for Genotyping-by-Sequencing with New Combinations of Restriction Enzymes
Source: Oxford University Press journal article supplement (doi:10.1534/g3.115.025775), 2016-03-08
Supplement: 025775_figures1.pdf [file 025775_figures1.pdf]

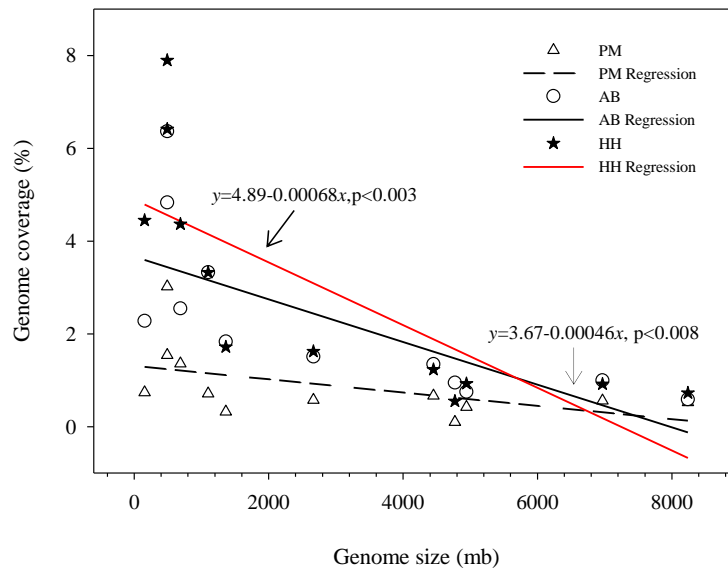

**Figure S1** The empirical genome coverages (%) obtained for three restriction enzyme combinations (PM=PstI+MspI; AB=AvaII+BfaI; HH=HinfI+HpyCH4IV) in 12 plant species in relations to their genome sizes. Significant linear regressions (in solid line) were detected for AB and HH
