# Supplementary material for: Increasing Genome Sampling and Improving SNP Genotyping for Genotyping-by-Sequencing with New Combinations of Restriction Enzymes
Source: Oxford University Press journal article supplement (doi:10.1534/g3.115.025775), 2016-03-08
Supplement: 025775_tables1.pdf [file 025775_tables1.pdf]

**Table S1 List of 60 restriction enzymes used in this study, along with their catalogue numbers and basic features: recognition site and length, reported methylation sensitivity, active temperature (Temp) and unit cost (€/unit)**

| Enzyme <sup>a</sup> | Catalogue number       | Recognition site | Site length | Methylation | Temp (°C) | €/unit |
|---------------------|------------------------|------------------|-------------|-------------|-----------|--------|
| AccII (FnuDII)      | Clontech 1002A         | CG CG            | 4           | CpG         | 37        | 45     |
| AflII               | R0520L                 | C TTAAG          | 6           | No          | 37        | 3.4    |
| AluI                | R0137L                 | AG CT            | 4           | No          | 37        | 7.2    |
| AlwNI               | R0514L                 | CAGNNN CTG       | 9           | dcm         | 37        | 14.4   |
| ApeKI               | R0643L                 | G CWGC           | 5           | CpG         | 75        | 29.8   |
| AvaII               | R0153L                 | G GWCC           | 5           | CpG         | 37        | 3.4    |
| BamHI               | R0136L                 | G GATCC          | 6           | No          | 37        | 0.6    |
| BfaI                | R0568L                 | C TAG            | 4           | No          | 37        | 15.6   |
| BglII               | R0143L                 | GCCNNNN NGGC     | 11          | CpG         | 37        | 3.2    |
| BglIII              | R0144L                 | A GATCT          | 6           | No          | 37        | 3.2    |
| BsrFI               | R0562L                 | R CCGGY          | 6           | CpG         | 37        | 6.9    |
| BssHII              | R0199L                 | G CGCGC          | 6           | CpG         | 37        | 14.4   |
| BstNI               | R0168L                 | CC WGG           | 5           | No          | 60        | 2.1    |
| BstYI               | R0523L                 | R GATCY          | 6           | No          | 60        | 3.4    |
| CviAII              | R0640L                 | C ATG            | 4           | No          | 25        | 34.3   |
| CviKI-1 (CviTI)     | R0710L                 | RG CY            | 4           | No          | 37        | 29.8   |
| CviRI               | Jin <i>et al.</i> 1994 | TG CA            | 4           | CpG         | 23        | n/a    |
| DdeI                | R0175L                 | C TNAG           | 5           | No          | 37        | 7.2    |
| DpnI                | R0176L                 | GA TC            | 4           | CpG         | 37        | 6.9    |
| EagI                | R3505L                 | C GGCCG          | 6           | CpG         | 37        | 13.7   |
| EcoRI               | R3101L                 | G AATTC          | 6           | CpG         | 37        | 0.6    |
| EcoRV               | R0195L                 | GAT ATC          | 6           | CpG         | 37        | 1.6    |
| EcoT22I (AvaIII)    | Clontech 1125A         | ATGCA T          | 6           | No          | 37        | 3.8    |
| Fnu4HI              | R0178L                 | GC NGC           | 5           | CpG         | 37        | 36.1   |
| FseI                | R0588L                 | GGCCGG CC        | 8           | CpG,dcm     | 37        | 77.8   |
| HaeIII              | R0108L                 | GG CC            | 4           | No          | 37        | 2.2    |
| HhaI                | R0139L                 | GCG C            | 4           | CpG         | 37        | 3.2    |
| HindIII             | R3104L                 | A AGCTT          | 6           | No          | 37        | 0.6    |
| HinfI               | R0155L                 | G ANTC           | 5           | CpG         | 37        | 1.3    |
| Hpy188I             | R0617L                 | TCN GA           | 5           | dam         | 37        | 7.2    |
| Hpy99I              | R0615L                 | CGWCG            | 5           | CpG         | 37        | 72.2   |
| HpyCH4III           | R0618L                 | ACN GT           | 5           | No          | 37        | 28.9   |
| HpyCH4IV            | R0619L                 | A CGT            | 4           | CpG         | 37        | 14.4   |
| KpnI                | R3142L                 | GGTAC C          | 6           | No          | 37        | 1.7    |
| MluCI               | R0538L                 | AATT             | 4           | No          | 37        | 6.9    |
| MseI                | R0525L                 | T TAA            | 4           | No          | 37        | 14.4   |
| MspI                | R0106L                 | C CGG            | 4           | No          | 37        | 1.4    |
| NciI                | R0196L                 | CC SGG           | 5           | CpG         | 37        | 3.4    |
| NgoMIV              | R0564L                 | G CCGGC          | 6           | CpG         | 37        | 6.9    |
| NlaIII              | R0125L                 | CATG             | 4           | No          | 37        | 14.4   |
| NotI                | R0189L                 | GC GGCCGC        | 8           | CpG         | 37        | 15.6   |
| NsiI                | R0127L                 | ATGCA T          | 6           | No          | 37        | 6.9    |
| PsiI                | R0657L                 | TTA TAA          | 6           | No          | 37        | 61.9   |
| PstI                | R3140L                 | CTGCA G          | 6           | No          | 37        | 0.7    |
| RsaI                | R0167L                 | GT AC            | 4           | CpG         | 37        | 6.3    |
| SacI                | R0156L                 | GAGCT C          | 6           | No          | 37        | 3.2    |
| SacII               | R0157L                 | CCGC GG          | 6           | CpG         | 37        | 3.3    |
| SalI                | R3138L                 | G TCGAC          | 6           | CpG         | 37        | 3.3    |
| Sau96I              | R0165L                 | G GNCC           | 5           | CpG,dcm     | 37        | 6.6    |
| SbfI                | R0642L                 | CCTGCA GG        | 8           | No          | 37        | 15.6   |
| ScrFI               | R0110L                 | CC NGG           | 5           | CpG,dcm     | 37        | 7.2    |
| SgrAI               | R0603L                 | CR CCGGYG        | 8           | CpG         | 37        | 7.2    |
| SmaI                | R0141L                 | CCC GGG          | 6           | CpG         | 25        | 3.3    |
| SphI                | R0182L                 | GCATG C          | 6           | No          | 37        | 14.4   |
| SspI                | R0132L                 | AAT ATT          | 6           | No          | 37        | 7.4    |
| TaqI                | R0149L                 | T CGA            | 4           | dam         | 65        | 1.6    |
| TfiI                | R0546L                 | G AWTC           | 5           | CpG         | 65        | 14.4   |
| Tsp45I              | R0583L                 | GTSAC            | 5           | No          | 65        | 37.2   |
| XbaI                | R0145L                 | T CTAGA          | 6           | dam         | 37        | 2.5    |
| XhoI                | R0146L                 | C TCGAG          | 6           | CpG         | 37        | 1.5    |

<sup>a</sup> The enzyme information, including methylation sensitive, active temperature and cost per unit (in Canadian dollars), was obtained from the catalogues of New England BioLabs (starting with R) and Clontech, or published literature (Jin *et al.* 1994. Nucl. Acids Res. 22:3928–3929). Alternate name for the enzyme is given in parenthesis.
