# Supplementary material for: Increasing Genome Sampling and Improving SNP Genotyping for Genotyping-by-Sequencing with New Combinations of Restriction Enzymes
Source: Oxford University Press journal article supplement (doi:10.1534/g3.115.025775), 2016-03-08
Supplement: 025775_tables2.pdf [file 025775_tables2.pdf]

**Table S2 List of 22 species (8 plant, 13 animal and 1 fungus) and their genome sequence information obtained from NCBI database for *in silico* analysis of restriction enzyme digestions**

| Species                  | Scientific name                 | NCBI ID                   | SL <sup>a</sup> | NC <sup>a</sup> | Download link <sup>a</sup> | Reference <sup>b</sup>                                         |
|--------------------------|---------------------------------|---------------------------|-----------------|-----------------|----------------------------|----------------------------------------------------------------|
| <i>Plant</i>             |                                 |                           |                 |                 |                            |                                                                |
| <i>Arabidopsis</i>       | <i>Arabidopsis thaliana</i>     | TAIR10                    | 119,667,750     | 5               | NCBI1/GCF_000001735.3      | Meinke et al. 1998. Science 282:679-682                        |
| Black cottonwood         | <i>Populus trichocarpa</i>      | Genome ID 98              | 378,545,565     | 19              | NCBI2/98                   | Tuskan et al. 2006. Science 313:1596-1604                      |
| Medicago                 | <i>Medicago truncatula</i>      | MedtrA17_4.0              | 412,800,391     | 8               | NCBI1/GCA_000219495.2      | Tang et al. 2014. BMC Genomics 15:312                          |
| Wine grape               | <i>Vitis vinifera</i>           | Genome ID 401             | 426,176,009     | 19              | NCBI2/401                  | Jaillon et al. 2007. Nature 449:463-467                        |
| Soybean                  | <i>Glycine max</i>              | V1.1                      | 973,779,290     | 20              | NCBI1/GCF_000004515.3      | Schmutz et al. 2010. Nature 463:178-183                        |
| Rice                     | <i>Oryza sativa japonica</i>    | Build 4.0                 | 382,778,125     | 12              | NCBI1/GCF_000005425.2      | Tanaka et al. 2008. Nucl Acids Res 36:D1028-33                 |
| Sorghum                  | <i>Sorghum bicolor</i>          | Sorbi1                    | 739,150,314     | 10              | NCBI1/GCF_000003195.2      | Paterson et al. 2009. Nature, 457:551-556                      |
| Maize                    | <i>Zea mays</i>                 | B73 RefGen_v3             | 2,067,622,303   | 10              | NCBI1/GCF_000005005.1      | Schnable et al. 2009. Science 326:1112-1115                    |
| <i>Animal</i>            |                                 |                           |                 |                 |                            |                                                                |
| <i>C. elegans</i>        | <i>Caenorhabditis elegans</i>   | WBcel235                  | 100,286,401     | 6               | NCBI1/GCA_000002985.3      | C. elegans Sequencing Consortium. 1998. Science. 282:2012-2018 |
| Fruit fly                | <i>Drosophila melanogaster</i>  | Release 6 plus ISO1 MT    | 143,726,002     | 7               | NCBI1/GCF_000001215.4/     | Hoskins et al. 2007. Science 16:1625-1628                      |
| Honey bee                | <i>Apis mellifera</i>           | Amel_4.5                  | 250,287,000     | 16              | NCBI1/GCF_000002195.4      | Elsik et al. 2014. BMC Genomics 15:86                          |
| Three-spined stickleback | <i>Gasterosteus aculeatus</i>   | BROADS1                   | 400,788,495     | 21              | NCBI3/86302700             | Jones et al. 2012. Nature 484:55-61                            |
| Northern pike            | <i>Esox lucius</i>              | EsoLuc1.0                 | 877,830,608     | 25              | NCBI1/GCF_000721915.1/     | Rondeau et al. 2014. PLoS One 9: e102089                       |
| Zebra fish               | <i>Danio rerio</i>              | GRCz10                    | 1,371,719,383   | 25              | NCBI1/GCA_000002035.3      | Howe et al. 2013. Nature. 496:498-503                          |
| Turkey                   | <i>Meleagris gallopavo</i>      | Turkey_2.01               | 1,061,817,103   | 32              | NCBI1/GCF_000146605.1      | Dalloul et al. 2010. PLoS Biol 8: e1000475                     |
| Zebra finch              | <i>Taeniopygia guttata</i>      | Taeniopygia_guttata-3.2.4 | 1,232,135,591   | 35              | NCBI1/GCA_000151805.2      | Warren et al. 2010. Nature. 464:757-762                        |
| Dog                      | <i>Canis lupus familiaris</i>   | CanFam3.1                 | 2,410,976,875   | 39              | NCBI1/GCA_000002285.2      | Lindblad-Toh et al. 2005. Nature. 438:803-819                  |
| Housecat                 | <i>Felis sylvestrus catus</i>   | Felis_catus_8.0           | 2,641,342,258   | 19              | NCBI1/GCA_000181335.3      | Pontius et al. 2007. Genome Res. 17:1675-1689                  |
| House mouse              | <i>Mus musculus</i>             | GRCm38.p3                 | 2,800,055,571   | 21              | NCBI1/GCF_000001635.23/    | Church et al. 2011. PLoS Biol 9:e1001091                       |
| Pigmy chimp              | <i>Pan paniscus</i>             | panpan1.1                 | 3,286,643,896   | 24              | NCBI1/GCA_000258655.2      | Prufer et al. 2012. Nature. 486:527-531                        |
| Opossum                  | <i>Monodelphis domestica</i>    | MonDom5                   | 3,598,443,077   | 9               | NCBI1/GCF_000002295.2      | Mikkelsen et al. 2007. Nature 447:167-177                      |
| <i>Fungi</i>             |                                 |                           |                 |                 |                            |                                                                |
| Baker's yeast            | <i>Saccharomyces cerevisiae</i> | R64                       | 12,157,105      | 16              | NCBI1/GCA_000146045.2      | Strope et al. 2015. Genome Res. 25:762-74                      |

<sup>a</sup> SL=sequence length; NC=number of chromosomes; NCBI1=<http://www.ncbi.nlm.nih.gov/assembly>; NCBI2=<http://www.ncbi.nlm.nih.gov/genome>; NCBI3=<http://www.ncbi.nlm.nih.gov/nuccore>.

<sup>b</sup> The listed references here are independent from those used in the paper .
