# Supplementary material for: Increasing Genome Sampling and Improving SNP Genotyping for Genotyping-by-Sequencing with New Combinations of Restriction Enzymes
Source: Oxford University Press journal article supplement (doi:10.1534/g3.115.025775), 2016-03-08
Supplement: 025775_tables3.pdf [file 025775_tables3.pdf]

**Table S3 The *in silico* genome coverages (IgC; %) of 22 species with sequenced genomes (8 plant, 13 animals and 1 fungus) by DNA fragments of different ends and lengths (100-600bp) obtained from *in silico* digestions by 70 restriction enzyme pairs, including the GBS reference pair PstI+MspI**

| Enzyme pair       | Plant       |            |          |           |         |      |         |       |            |           |           |             |      |           |        |             |      | Animal   |             |             |         |               |          |         |             |  |  | Fungi |  |  |
|-------------------|-------------|------------|----------|-----------|---------|------|---------|-------|------------|-----------|-----------|-------------|------|-----------|--------|-------------|------|----------|-------------|-------------|---------|---------------|----------|---------|-------------|--|--|-------|--|--|
|                   | Arabidopsis | Cottonwood | Medicago | Winegrape | Soybean | Rice | Sorghum | Maize | C. elegans | Fruit fly | Honey bee | Stickleback | Pike | Zebrafish | Turkey | Zebra finch | Dog  | Housecat | House mouse | Pigmy chimp | Opossum | Baker's yeast | Mean_all | STD_all | Mean_plants |  |  |       |  |  |
| genome size (Mbp) | 120         | 379        | 297      | 426       | 950     | 382  | 659     | 2060  | 83         | 158       | 220       | 401         | 377  | 1340      | 1040   | 1021        | 2328 | 2419     | 2726        | 3152        | 2998    | 12            |          |         |             |  |  |       |  |  |
| CviAI+Hinfl       | 35.1        | 32.5       | 27.9     | 31.4      | 32.5    | 31.1 | 30.8    | 33.8  | 31.9       | 30.1      | 24.6      | 35.0        | 31.0 | 31.0      | 30.8   | 34.5        | 35.9 | 35.5     | 34.2        | 30.0        | 35.2    | 36.5          | 32.3     | 2.9     | 31.9        |  |  |       |  |  |
| CviAI+Ddel        | 34.4        | 30.8       | 26.6     | 30.6      | 30.9    | 30.3 | 31.8    | 32.9  | 27.0       | 29.7      | 16.1      | 35.1        | 32.9 | 33.3      | 31.9   | 35.9        | 35.3 | 34.9     | 33.1        | 29.3        | 34.5    | 35.9          | 31.5     | 4.4     | 31.0        |  |  |       |  |  |
| Bfal+Hinfl        | 32.5        | 32.5       | 26.0     | 30.9      | 31.4    | 32.0 | 31.8    | 34.6  | 27.9       | 24.5      | 17.5      | 24.9        | 30.2 | 27.9      | 29.3   | 31.8        | 36.3 | 35.2     | 34.6        | 30.7        | 35.3    | 34.8          | 30.6     | 4.5     | 31.5        |  |  |       |  |  |
| Bfal+Ddel         | 32.5        | 31.4       | 25.0     | 30.4      | 30.4    | 31.2 | 32.3    | 34.2  | 23.8       | 24.0      | 11.8      | 25.1        | 30.8 | 29.1      | 28.7   | 30.9        | 33.6 | 32.9     | 32.4        | 29.0        | 33.6    | 34.4          | 29.4     | 5.1     | 30.9        |  |  |       |  |  |
| CviAI+TfiI        | 33.4        | 27.9       | 24.3     | 27.2      | 27.7    | 25.8 | 26.2    | 27.6  | 29.3       | 25.8      | 24.5      | 26.6        | 23.2 | 23.7      | 24.7   | 26.6        | 28.4 | 29.7     | 25.9        | 24.0        | 30.8    | 33.9          | 27.2     | 2.9     | 27.5        |  |  |       |  |  |
| Bfal+TfiI         | 31.8        | 29.1       | 23.6     | 27.9      | 28.2    | 27.0 | 27.3    | 29.1  | 25.9       | 21.4      | 17.8      | 20.5        | 24.0 | 22.4      | 24.4   | 25.8        | 30.0 | 31.8     | 28.0        | 25.6        | 30.9    | 32.7          | 26.6     | 3.9     | 28.0        |  |  |       |  |  |
| MluCI+Hinfl       | 25.3        | 18.0       | 14.1     | 19.8      | 19.2    | 24.9 | 28.1    | 29.1  | 13.5       | 20.7      | 14.1      | 33.0        | 28.4 | 24.2      | 25.1   | 26.6        | 29.6 | 29.4     | 30.1        | 23.5        | 24.5    | 24.2          | 23.9     | 5.5     | 22.3        |  |  |       |  |  |
| MluCI+Ddel        | 24.4        | 17.3       | 13.6     | 19.4      | 18.6    | 24.0 | 27.5    | 29.0  | 10.2       | 19.6      | 7.4       | 33.3        | 30.1 | 26.0      | 26.5   | 28.4        | 28.6 | 29.4     | 29.2        | 23.5        | 24.1    | 22.3          | 23.3     | 6.7     | 21.7        |  |  |       |  |  |
| CviAI+ApeKI       | 19.3        | 17.2       | 12.9     | 13.4      | 14.2    | 25.3 | 22.6    | 23.8  | 18.5       | 27.7      | 11.0      | 33.7        | 25.6 | 26.6      | 28.1   | 31.8        | 24.9 | 23.9     | 25.9        | 21.0        | 20.9    | 25.4          | 22.4     | 6.0     | 18.6        |  |  |       |  |  |
| Hinfl+MseI        | 28.1        | 22.0       | 18.7     | 24.7      | 24.3    | 28.0 | 28.8    | 30.6  | 27.0       | 7.9       | 4.3       | 10.4        | 9.8  | 21.6      | 8.4    | 28.3        | 28.8 | 28.7     | 11.2        | 26.1        | 7.0     | 31.6          | 20.7     | 9.2     | 25.6        |  |  |       |  |  |
| Hinfl+HpyCH4IV    | 29.4        | 22.7       | 21.6     | 18.0      | 23.1    | 17.9 | 27.2    | 27.9  | 30.5       | 14.3      | 11.6      | 16.1        | 14.8 | 24.8      | 11.7   | 16.0        | 19.4 | 22.7     | 9.3         | 15.8        | 5.6     | 35.4          | 20.3     | 7.7     | 24.7        |  |  |       |  |  |
| Ddel+MseI         | 27.1        | 20.8       | 17.9     | 24.1      | 23.2    | 26.9 | 29.3    | 30.3  | 21.5       | 8.3       | 3.7       | 10.2        | 9.3  | 22.6      | 6.0    | 29.5        | 29.0 | 29.1     | 7.5         | 25.1        | 5.5     | 30.0          | 19.9     | 9.5     | 25.0        |  |  |       |  |  |
| MluCI+TfiI        | 23.7        | 15.0       | 11.8     | 16.6      | 15.9    | 19.9 | 23.3    | 24.6  | 11.8       | 16.9      | 13.1      | 24.8        | 21.0 | 18.4      | 19.6   | 19.8        | 22.7 | 25.3     | 22.6        | 18.5        | 20.4    | 20.6          | 19.4     | 4.1     | 18.9        |  |  |       |  |  |
| Ddel+HpyCH4IV     | 29.2        | 22.2       | 20.8     | 17.5      | 22.6    | 27.2 | 27.2    | 27.5  | 26.3       | 14.9      | 9.3       | 15.9        | 13.8 | 26.0      | 8.6    | 14.6        | 18.0 | 20.7     | 6.5         | 14.2        | 4.7     | 35.2          | 19.2     | 8.1     | 24.3        |  |  |       |  |  |
| ApeKI+Bfal        | 19.5        | 18.3       | 13.1     | 14.9      | 15.1    | 26.3 | 23.3    | 24.3  | 16.8       | 12.6      | 5.9       | 13.8        | 14.7 | 25.2      | 13.5   | 29.8        | 26.6 | 23.9     | 14.1        | 22.8        | 10.5    | 24.3          | 18.6     | 6.3     | 19.4        |  |  |       |  |  |
| TfiI+HpyCH4IV     | 29.0        | 20.7       | 19.7     | 16.8      | 21.5    | 24.2 | 24.2    | 23.7  | 28.3       | 13.9      | 12.3      | 15.2        | 13.2 | 20.2      | 10.9   | 13.3        | 16.8 | 20.7     | 9.1         | 13.8        | 6.1     | 33.3          | 18.5     | 6.9     | 22.5        |  |  |       |  |  |
| NlaIII+MluCI      | 25.7        | 19.4       | 16.0     | 20.2      | 19.6    | 25.4 | 27.0    | 29.0  | 13.4       | 5.2       | 2.4       | 10.8        | 7.7  | 27.1      | 6.3    | 28.7        | 29.3 | 30.2     | 8.0         | 24.3        | 5.4     | 24.3          | 18.4     | 9.4     | 22.8        |  |  |       |  |  |
| TfiI+MseI         | 26.5        | 19.0       | 16.3     | 21.5      | 20.9    | 23.6 | 24.3    | 26.3  | 24.5       | 7.8       | 5.0       | 9.7         | 8.5  | 16.0      | 7.7    | 21.4        | 22.2 | 23.9     | 10.1        | 21.0        | 7.1     | 28.3          | 17.8     | 7.5     | 22.3        |  |  |       |  |  |
| CviAI+Avall       | 15.6        | 14.0       | 12.3     | 14.5      | 14.6    | 18.7 | 20.8    | 24.7  | 12.4       | 15.9      | 7.0       | 22.9        | 19.6 | 13.4      | 14.5   | 17.7        | 20.4 | 20.9     | 22.3        | 14.9        | 20.0    | 18.1          | 17.1     | 4.2     | 16.9        |  |  |       |  |  |
| ApeKI+MseI        | 17.2        | 14.1       | 9.9      | 13.2      | 12.8    | 25.1 | 22.9    | 23.2  | 15.8       | 7.2       | 3.8       | 10.0        | 9.5  | 19.5      | 7.0    | 26.7        | 21.8 | 20.4     | 10.8        | 19.2        | 6.2     | 21.3          | 15.3     | 6.8     | 17.3        |  |  |       |  |  |
| Avall+Bfal        | 16.1        | 15.3       | 12.3     | 15.8      | 15.5    | 20.6 | 21.8    | 26.2  | 11.3       | 9.0       | 3.9       | 11.6        | 12.3 | 13.0      | 9.0    | 17.3        | 22.5 | 21.4     | 13.4        | 16.2        | 10.0    | 18.1          | 15.1     | 5.3     | 17.9        |  |  |       |  |  |
| HinP1+Hinfl       | 11.2        | 10.0       | 7.7      | 8.0       | 10.6    | 22.3 | 22.3    | 25.6  | 19.2       | 26.6      | 20.0      | 26.9        | 16.5 | 17.8      | 7.8    | 7.2         | 10.4 | 12.8     | 8.3         | 8.6         | 4.1     | 23.8          | 14.9     | 7.3     | 14.7        |  |  |       |  |  |
| Hhal+Hinfl        | 11.2        | 10.0       | 7.7      | 8.0       | 10.6    | 22.3 | 22.3    | 25.6  | 19.2       | 26.6      | 20.0      | 26.9        | 16.5 | 17.8      | 7.8    | 7.2         | 10.4 | 12.8     | 8.3         | 8.6         | 4.1     | 23.8          | 14.9     | 7.3     | 14.7        |  |  |       |  |  |
| ApeKI+HpyCH4IV    | 17.4        | 13.7       | 11.0     | 9.2       | 11.4    | 23.0 | 20.5    | 21.6  | 18.0       | 13.4      | 6.5       | 15.9        | 13.6 | 22.3      | 10.3   | 14.4        | 15.5 | 17.5     | 8.9         | 12.3        | 4.6     | 25.7          | 14.8     | 5.5     | 16.0        |  |  |       |  |  |
| Hinfl+MspI        | 19.0        | 13.3       | 11.3     | 11.2      | 11.8    | 24.0 | 23.3    | 26.6  | 22.7       | 12.5      | 8.3       | 14.6        | 11.3 | 15.8      | 4.6    | 8.5         | 14.6 | 14.0     | 6.8         | 11.4        | 3.0     | 23.8          | 14.2     | 6.6     | 17.6        |  |  |       |  |  |
| Hhal+Ddel         | 11.4        | 9.7        | 7.6      | 7.7       | 10.6    | 21.7 | 22.1    | 23.9  | 16.4       | 26.2      | 12.6      | 26.6        | 16.5 | 18.2      | 6.8    | 6.4         | 10.2 | 10.5     | 6.3         | 6.9         | 3.3     | 22.8          | 13.8     | 7.3     | 14.3        |  |  |       |  |  |
| HinP1+Ddel        | 11.4        | 9.7        | 7.6      | 7.7       | 10.6    | 21.7 | 22.1    | 23.9  | 16.4       | 26.2      | 12.6      | 26.6        | 16.5 | 18.2      | 6.8    | 6.4         | 10.2 | 10.5     | 6.3         | 6.9         | 3.3     | 22.8          | 13.8     | 7.3     | 14.3        |  |  |       |  |  |
| Ddel+MspI         | 19.7        | 13.3       | 11.3     | 11.0      | 12.0    | 23.7 | 23.6    | 27.5  | 20.5       | 13.2      | 7.4       | 14.6        | 10.6 | 15.9      | 3.2    | 7.8         | 13.9 | 12.5     | 4.4         | 9.5         | 2.1     | 24.2          | 13.7     | 7.0     | 17.8        |  |  |       |  |  |
| ApeKI+MluCI       | 15.5        | 10.9       | 7.1      | 9.9       | 10.1    | 22.0 | 20.8    | 21.8  | 7.7        | 4.8       | 2.1       | 12.4        | 10.0 | 21.6      | 6.6    | 25.2        | 21.9 | 20.2     | 10.3        | 17.8        | 4.8     | 15.5          | 13.6     | 6.9     | 14.8        |  |  |       |  |  |
| HinP1+TfiI        | 11.6        | 9.3        | 7.4      | 7.7       | 10.3    | 19.8 | 20.1    | 22.1  | 18.0       | 23.3      | 20.4      | 22.3        | 13.6 | 14.7      | 6.5    | 5.9         | 9.4  | 11.9     | 7.0         | 7.6         | 3.8     | 22.3          | 13.4     | 6.5     | 13.5        |  |  |       |  |  |
| Hhal+TfiI         | 11.6        | 9.3        | 7.4      | 7.7       | 10.3    | 19.8 | 20.1    | 22.1  | 18.0       | 23.3      | 20.4      | 22.3        | 13.6 | 14.7      | 6.5    | 5.9         | 9.4  | 11.9     | 7.0         | 7.6         | 3.8     | 22.3          | 13.4     | 6.5     | 13.5        |  |  |       |  |  |
| TfiI+MspI         | 19.5        | 12.4       | 10.4     | 10.8      | 10.9    | 21.0 | 20.8    | 22.9  | 21.4       | 12.3      | 9.6       | 14.2        | 10.3 | 13.2      | 4.3    | 7.0         | 13.1 | 12.9     | 6.8         | 10.2        | 3.4     | 22.9          | 13.2     | 5.9     | 16.1        |  |  |       |  |  |
| Avall+MseI        | 12.9        | 9.8        | 7.9      | 12.6      | 12.0    | 18.1 | 20.4    | 23.6  | 10.5       | 6.1       | 2.9       | 9.3         | 8.4  | 9.8       | 5.9    | 16.2        | 18.2 | 18.1     | 10.1        | 13.8        | 5.6     | 15.5          | 12.2     | 5.3     | 14.6        |  |  |       |  |  |
| Avall+HpyCH4IV    | 14.4        | 11.3       | 10.4     | 10.2      | 12.0    | 17.7 | 18.7    | 21.9  | 12.1       | 9.4       | 4.3       | 13.2        | 11.5 | 12.0      | 7.3    | 9.6         | 13.9 | 15.8     | 8.3         | 9.3         | 4.5     | 18.3          | 12.1     | 4.5     | 14.6        |  |  |       |  |  |
| Avall+ApeKI       | 10.4        | 9.7        | 7.0      | 9.1       | 8.9     | 17.7 | 17.4    | 20.2  | 7.8        | 8.2       | 2.9       | 12.8        | 11.4 | 12.8      | 7.8    | 17.1        | 18.6 | 17.3     | 12.8        | 13.3        | 8.5     | 14.4          | 12.1     | 4.5     | 12.5        |  |  |       |  |  |
| MspI+MseI         | 16.6        | 8.8        | 7.9      | 9.5       | 9.5     | 21.6 | 22.0    | 24.3  | 19.5       | 7.6       | 4.7       | 9.8         | 7.8  | 12.5      | 3.3    | 7.8         | 12.3 | 12.2     | 6.1         | 11.1        | 2.3     | 20.0          | 11.7     | 6.3     | 15.0        |  |  |       |  |  |
| HinP1+ApeKI       | 7.6         | 6.3        | 4.3      | 4.7       | 5.9     | 17.1 | 16.3    | 17.7  | 11.5       | 23.6      | 8.8       | 24.8        | 13.8 | 15.4      | 6.1    | 5.5         | 8.8  | 10.5     | 7.0         | 7.1         | 2.6     | 17.3          | 11.0     | 6.3     | 10.0        |  |  |       |  |  |
| Avall+MluCI       | 11.5        | 7.8        | 5.9      | 9.9       | 9.7     | 16.4 | 19.0    | 22.4  | 5.0        | 4.4       | 1.7       | 11.3        | 8.8  | 11.2      | 5.7    | 15.1        | 18.8 | 18.5     | 9.7         | 12.8        | 5.0     | 10.8          | 11.0     | 5.5     | 12.8        |  |  |       |  |  |
| ApeKI+MspI        | 12.4        | 8.6        | 6.3      | 6.8       | 6.5     | 18.8 | 17.0    | 19.5  | 14.1       | 11.2      | 5.2       | 14.1        | 10.2 | 14.1      | 3.4    | 7.1         | 12.0 | 11.6     | 6.6         | 9.7         | 2.5     | 18.0          | 10.7     | 4.9     | 12.0        |  |  |       |  |  |
| ApeKI+Hhal        | 7.7         | 6.4        | 4.4      | 4.7       | 5.9     | 17.1 | 16.3    | 17.5  | 11.5       | 12.1      | 5.3       | 13.5        | 8.7  | 15.6      | 3.5    | 5.7         | 9.0  | 10.6     | 4.5         | 7.2         | 1.7     | 17.3          | 9.4      | 5.0     | 10.0        |  |  |       |  |  |
| HinP1+Avall       | 6.4         | 5.3        | 4.2      | 5.1       | 6.8     | 14.3 | 16.2    | 19.9  | 8.0        | 14.2      | 6.1       | 18.8        | 11.7 | 8.7       | 4.7    | 4.7         | 8.7  | 9.4      | 6.5         | 5.8         | 2.8     | 13.1          | 9.2      | 4.9     | 9.8         |  |  |       |  |  |
| Avall+MspI        | 9.9         | 6.7        | 5.7      | 6.7       | 6.9     | 14.7 | 16.6    | 19.1  | 9.3        | 7.7       | 3.3       | 11.5        | 8.4  | 7.6       | 3.1    | 5.5         | 11.1 | 10.6     | 6.3         | 7.6         | 2.6     | 13.1          | 8.8      | 4.3     | 10.8        |  |  |       |  |  |
| NsII+Bfal         | 10.3        | 12.7       | 10.9     | 12.3      | 13.0    | 12.0 | 12.1    | 9.7   | 6.1        | 5.0       | 3.4       | 5.3         | 6.4  | 11.6      | 6.4    | 9.7         | 8.9  | 8.3      | 5.7         | 7.8         | 5.1     | 8.4           | 8.7      | 2.9     | 11.6        |  |  |       |  |  |
| Avall+Hhal        | 6.4         | 5.3        | 4.2      | 5.1       | 6.8     | 14.3 | 16.2    | 19.9  | 8.0        | 8.4       | 3.7       | 11.5        | 7.6  | 8.7       | 3.2    | 4.7         | 8.7  | 9.4      | 4.3         | 5.8         | 1.8     | 13.1          | 8.1      | 4.5     | 9.8         |  |  |       |  |  |
| HindIII+Bfal      | 13.6        | 10.9       | 8.3      | 11.6      | 10.6    | 8.0  | 10.1    | 9.5   | 9.1        | 4.1       | 2.7       | 4.1         | 3.9  | 7.8       | 6.3    | 10.2        | 8.4  | 8.4      | 5.4         | 7.5         | 4.9     | 10.3          | 8.0      | 2.9     | 10.3        |  |  |       |  |  |
| NsII+HpyCH4IV     | 9.5         | 9.2        | 9.2      | 7.3       | 9.9     | 10.8 | 10.7    | 8.5   | 6.6        | 5.3       | 3.8       | 6.1         | 6.0  | 10.1      | 4.9    | 4.8         | 5.1  | 5.6      | 3.4         | 4.3         | 2.0     | 8.8           | 6.9      | 2.6     | 9.4         |  |  |       |  |  |
| EcoRI+Bfal        | 8.5         | 8.2        | 6.5      | 7.9       | 7.7     | 6.3  | 6.8     | 7.0   | 10.6       | 4.2       | 4.6       | 2.9         | 3.5  | 4.7       | 4.6    | 7.9         | 7.8  | 8.2      | 5.3         | 6.8         | 6.3     | 9.9           | 6.6      | 2.0     | 7.4         |  |  |       |  |  |
| HindIII+HpyCH4IV  | 12.3        | 8.0        | 6.8      | 6.9       | 8.0     | 7.1  | 9.4     | 7.4   | 10.2       | 4.8       | 3.2       | 4.8         | 3.7  | 7.1       | 4.9    | 5.2         | 5.1  | 5.9      | 3.3         | 4.1         | 1.9     | 10.7          | 6.4      | 2.7     | 8.2         |  |  |       |  |  |
| NsII+MseI         | 7.0         | 7.1        | 6.1      | 8.2       | 8.3     | 9.0  | 9.9     | 8.4   | 4.9        | 2.6       | 1.1       | 3.3         | 3.3  | 6.4       | 3.1    | 6.4         | 5.5  | 5.3      | 3.4         | 5.0         | 2.0     | 6.3           | 5.6      | 2.4     | 8.0         |  |  |       |  |  |
| NsII+MspI         | 6.5         | 5.5        | 5.2      | 4.7       | 5.6     | 9.7  | 10.1    | 8.5   | 5.1        | 5.1       | 2.8       | 6.0         | 4.7  | 6.8       | 1.8    | 2.3         | 3.9  | 3.3      | 2.5</       |             |         |               |          |         |             |  |  |       |  |  |
